# Supplementary material for: Proposal for the reclassification of obligately purine-fermenting bacteria Clostridium acidurici (Barker 1938) and Clostridium purinilyticum (Dürre et al. 1981) as Gottschalkia acidurici gen. nov. comb. nov. and Gottschalkia purinilytica comb. nov. and of Eubacterium angustum (Beuscher and Andreesen 1985) as Andreesenia angusta gen. nov. comb. nov. in the family Gottschalkiaceae fam. nov
Source: PubMed Central journal article supplement (PMC5737214; doi:10.1099/ijsem.0.002008), 2017-08-15
Supplement: ijsem-67-2711-s001.pdf [file ijsem-67-2711-s001.pdf]

## Supplementary Material for

**Proposal for reclassification of obligately purine-fermenting bacteria *Clostridium acidurici* (Liebert 1909) Barker & Beck 1942 and *Clostridium purinilyticum* (Dürre *et al.* 1981) as *Gottschalkia acidurici* gen. nov. comb. nov. and *Gottschalkia purinilytica* comb. nov. and of *Eubacterium angustum* (Beuscher & Andreesen 1985) as *Andreesenia angusta* gen. nov. comb. nov. in the family *Gottschalkiaceae* fam. nov.**

by

Anja Poehlein, Natalya Yutin, Rolf Daniel and Michael Y. Galperin

### SUPPLEMENTARY METHODS

#### 1. Construction of 16S rRNA gene-based trees

The 16S rRNA gene trees of *C. acidurici*, *C. purinilyticum*, and *E. angustum* and their neighbors from clusters I, XI, XII, and XIII were constructed using the neighbor-joining (Fig. 1) and maximum likelihood methods (see Fig. S1 below). The 16S rRNA gene sequences of the type strains were obtained either from GenBank or from the NCBI RefSeq Targeted Loci project (Federhen, 2015), as specified in the List of Prokaryotic Names with Standing in Nomenclature (Parte, 2014). Specifically, for the 16S rRNA gene sequence of the *C. acidurici* type strain 9a<sup>T</sup> (=DSM 604<sup>T</sup>), we have chosen the RefSeq entry NR\_117601, which is 100% identical to three out of six 16S rRNAs encoded in its complete genome (GenBank accession no. CP003326, positions 11128-12640, 2471929-2473441, and 3033096-3034608) and 99% identical to three other rRNAs (positions 992015-993528, 1003103-1004615, and 3020878-3022390). It is also 100% identical but longer than GenBank accession HE582772 and lacks the ambiguous nucleotide assignments found in the accession M59084, the current entry in the LPSN (Parte, 2014). For the 16S rRNA gene sequence of the *C. purinilyticum* type strain DSM 1384<sup>T</sup> (=ATCC 33906<sup>T</sup>), we have chosen GenBank accession FR749894, which is 100% identical to the RefSeq entry NR\_117121, 99% identical to four partial 16S rRNA genes encoded in its current genome assembly (GenBank accessions LGSS01000012, LGSS01000054, LGSS01000056, and LGSS01000064), and contains fewer ambiguous nucleotides than GenBank accession M60491. For *E. angustum* type strain DSM 1989<sup>T</sup>

(=ATCC 43737<sup>T</sup>), we used its canonical 16S rRNA gene sequence (GenBank accession L34612), which is 99% identical to the gene found in its recently sequenced genome (Poehlein *et al.*, 2017), GenBank accession MKIE00000000. Sequences were aligned with ClustalW (Thompson *et al.*, 1994), as implemented in the MEGA7 software suite (Kumar *et al.*, 2016), and the neighbor-joining and maximum likelihood trees were constructed using MEGA7.

## 2. Construction of the ribosomal proteins-based tree

The ribosomal proteins-based phylogenetic tree (Fig. 2) was constructed from a concatenated alignment of 50 widespread ribosomal proteins (L1–L7, L9–L11, L13–L24, L27–L29, L31–L36 and S2–S20), as described earlier (Yutin *et al.*, 2012; Yutin & Galperin, 2013). Protein sequences were taken from selected organisms with completely or partially sequenced genomes, where available (see Table S1 below). The missing 50S ribosomal protein L9 of *C. acidurici* was translated from the genome entry CP003326:3004005..3004453 by correcting a frameshift in the middle of its open reading frame. In those cases when the respective genomes had two *rpsD* genes encoding two different S4 proteins, we selected the protein encoded in the *rps* operon, between *rpsK* and *rpoA* genes (the topology of the final tree did not change upon inclusion or exclusion of S4 proteins). The missing 50S ribosomal proteins L36 from *Sporanaerobacter acetigenes* DSM 13106<sup>T</sup>, *Tepidimicrobium xylanilyticum* DSM 23310<sup>T</sup>, *Tissierella praeacuta* DSM 18095<sup>T</sup>, and *Tissierella creatinophila* DSM 6911<sup>T</sup> have been translated from the respective genomic sequences; all of them proved identical to the NCBI RefSeq entry WP\_041701799.1. Ribosomal protein sequences were aligned by MUSCLE (Edgar, 2004), these alignments were concatenated, and the resulting 6,222-position alignment was used to construct a phylogenetic tree using the PhyML program (Guindon *et al.*, 2010).

## 3. Trees for Individual ribosomal proteins

Approximately maximum-likelihood trees for individual ribosomal proteins were constructed using FastTree2 (Price *et al.*, 2010). Examination of those trees showed that in 37 out of 50 trees *C. acidurici*, *C. purinilyticum*, and *E. angustum* were grouped together in a single cluster; in 28 of these trees, those clusters had local support values of at least 70% (data not shown).

#### 4. Construction of the RpoB and GyrB trees

The sequences of DNA-directed RNA polymerase beta subunit (RpoB) and DNA gyrase subunit B (GyrB) from various members of clostridial clusters I, XI, XII, and XII with completely or partially sequenced genomes (Table S1), were extracted from the NCBI protein database. The sequences were aligned with MUSCLE (Edgar, 2004), as implemented in the MEGA7 software suite (Kumar *et al.*, 2016). The evolutionary history was inferred by using the maximum likelihood method based on the JTT matrix-based model (Jones *et al.*, 1992) and the trees with the highest log likelihood are shown in Fig. S2 (a) and (b). The percentage of trees in which the associated taxa clustered together is shown next to the branches. Initial tree(s) for the heuristic search were obtained automatically by applying neighbor-join and BioNJ algorithms to a matrix of pairwise distances estimated using a JTT model, and then selecting the topology with superior log likelihood value. The tree is drawn to scale, with branch lengths measured in the number of substitutions per site. In both cases, the analysis involved 23 amino acid sequences. All positions containing gaps and missing data were eliminated. There were a total of 1159 positions in the final dataset for RpoA and 627 positions for GyrB. Evolutionary analyses were conducted in MEGA7 (Kumar *et al.*, 2016).

#### 5. Search of metagenomic sequence data

Searches for *C. acidurici*-related 16S rRNA gene sequences were performed using BLASTn against the NCBI's nucleotide collection and the whole-genome shotgun contigs (WGS) database. The high-scoring hits were individually tested by reverse BLAST against the NCBI's database of 16S rRNA sequences (to ensure that they fall within the radiation of the proposed family *Gottschalkiaceae*) and checked for the presence of an associated publication and/or information on sampling location. We also checked selected entries from *Clostridiales* Family XI in the SILVA database (<https://www.arb-silva.de/browser/ssu-128/HE582772>) (Yilmaz *et al.*, 2014).

**Table S1. Source data for the phylogenetic trees**

| Organism name <sup>a,b</sup>                                                                                     | GenBank accession number |                  | Genome reference or sequencing center        |
|------------------------------------------------------------------------------------------------------------------|--------------------------|------------------|----------------------------------------------|
|                                                                                                                  | 16S rRNA                 | Genome           |                                              |
| <b>Proposed family <i>Gottschalkiaceae</i></b>                                                                   |                          |                  |                                              |
| <b>Proposed <i>Gottschalkia</i> spp.</b>                                                                         |                          |                  |                                              |
| <i>Clostridium acidurici</i> DSM 604 <sup>T</sup>                                                                | NR_117601                | CP003326         | Hartwich <i>et al.</i> (2012)                |
| <i>Clostridium purinilyticum</i> DSM 1384 <sup>T</sup>                                                           | FR749894                 | LGSS000000000    | Poehlein <i>et al.</i> (2015a)               |
| <b>Proposed <i>Andreesenia</i> sp.</b>                                                                           |                          |                  |                                              |
| <i>Eubacterium angustum</i> DSM 1989 <sup>T</sup>                                                                | L34612                   | MKIE000000000    | Poehlein <i>et al.</i> (2017)                |
| <b>Clostridial cluster I (family <i>Clostridiaceae</i>)</b>                                                      |                          |                  |                                              |
| <i>Clostridium butyricum</i> DSM 10702 <sup>T</sup>                                                              | AJ458420                 | AQQF000000000    | Xin <i>et al.</i> (2013)                     |
| <i>Clostridium cylindrosporum</i> DSM 605 <sup>T</sup>                                                           | Y18179                   | LFVU000000000    | Poehlein <i>et al.</i> (2015b)               |
| <b>Clostridial cluster XI (family <i>Peptostreptococcaceae</i>)</b>                                              |                          |                  |                                              |
| <i>Clostridioides difficile</i> <sup>b</sup> DSM 1296 <sup>T</sup>                                               | AB075770                 | CP011968         | Riedel <i>et al.</i> (2015)                  |
| <i>Acetoanaerobium sticklandii</i> <sup>b</sup> DSM 519 <sup>T</sup>                                             | NR_102880                | FP565809         | Fonknechten <i>et al.</i> (2010)             |
| <i>Paeniclostridium sordellii</i> ATCC 9714 <sup>T</sup>                                                         | AB075771                 | APWR000000000    | Sirigi Reddy <i>et al.</i> (2013)            |
| <i>Paraclostridium bif fermentans</i> ATCC 638 <sup>T</sup>                                                      | AB075769                 | AVNC000000000    | Univ. Maryland Sch. of Medicine, unpublished |
| <i>Peptoclostridium litorale</i> <sup>b</sup> DSM 5388 <sup>T</sup>                                              | X77845                   | JJMM000000000    | Poehlein <i>et al.</i> (2014)                |
| <i>Peptostreptococcus anaerobius</i> DSM 2949 <sup>T</sup>                                                       | AY326462                 | ARMA000000000    | DOE-JGI, unpublished                         |
| <b>Clostridial cluster XII (family <i>Tissierellaceae</i>)</b>                                                   |                          |                  |                                              |
| <i>Anaerosalibacter massiliensis</i> <sup>b</sup><br>( <i>Anaerosalibacter</i> sp.) ND1 <sup>T</sup> = DSM 27308 | HG315673                 | CCEZ000000000    | Dione <i>et al.</i> (2016)                   |
| [ <i>Clostridium</i> ] <i>ultunense</i> <sup>b</sup> DSM 10521 <sup>T</sup>                                      | GQ461825                 | AZSU000000000    | Wei <i>et al.</i> (2014)                     |
| <i>Soehngenia saccharolytica</i> DSM 12858 <sup>T</sup>                                                          | GQ461828                 | n/a <sup>c</sup> | n/a                                          |
| <i>Tissierella creatinophila</i> DSM 6911 <sup>T</sup>                                                           | GQ461823                 | LTDM000000000    | Nacke <i>et al.</i> (2017)                   |
| <i>Tissierella praeacuta</i> ATCC 25539 <sup>T</sup>                                                             | X80833                   | FQTY010000000    | DOE-JGI, unpublished                         |
| <b>Clostridial cluster XIII (family <i>Peptoniphilaceae</i>)</b>                                                 |                          |                  |                                              |
| <i>Anaerococcus prevotii</i> DSM 20548 <sup>T</sup>                                                              | NR_074575                | CP001708         | Labutti <i>et al.</i> (2009)                 |
| <i>Anaerosphaera aminiphila</i> DSM 21120 <sup>T</sup>                                                           | AB298735                 | FQXI000000000    | DOE-JGI, unpublished                         |
| <i>Fingoldia magna</i> ATCC 29328 <sup>T</sup>                                                                   | NR_074677                | AP008971         | Goto <i>et al.</i> (2008)                    |
| <i>Helcococcus kunzii</i> ATCC 51366 <sup>T</sup>                                                                | X69837                   | AGEI000000000    | Broad Inst., unpublished                     |

|                                                                |          |                  |                                          |
|----------------------------------------------------------------|----------|------------------|------------------------------------------|
| <i>Murdochiella asaccharolytica</i> ATCC BAA-1631 <sup>T</sup> | EU483153 | n/a <sup>c</sup> | n/a                                      |
| <i>Parvimonas micra</i> ATCC 33270 <sup>T</sup>                | AY323523 | ABEE00000000     | Washington Univ., St. Louis, unpublished |
| <i>Peptoniphilus lacrimalis</i> DSM 7455 <sup>T</sup>          | AF542230 | ARKX00000000     | DOE-JGI, unpublished                     |
| <b>Unclassified <i>Tissierella</i></b>                         |          |                  |                                          |
| <i>Sporanaerobacter acetigenes</i> DSM 13106 <sup>T</sup>      | AF358114 | FQXR00000000     | DOE-JGI, unpublished                     |
| <i>Tepidimicrobium xylanilyticum</i> DSM 23310 <sup>T</sup>    | EF522948 | FNNG01000000     | DOE-JGI, unpublished                     |

<sup>a</sup> – As of February 1<sup>st</sup>, 2017. Assignments to *Clostridium* clusters are from Collins *et al.* (1994), family assignments are from Alauzet *et al.* (2014), Galperin *et al.* (2016), and Johnson *et al.* (2014).

<sup>b</sup> – *Clostridioides difficile*, *Acetoanaerobium sticklandii*, and *Peptoclostridium litorale* are recently renamed former *Clostridium* species (Galperin *et al.*, 2016; Lawson *et al.*, 2016). [*Clostridium*] *ultunense* is a misclassified but validly described organism. The name *Anaerosalibacter massiliensis* has not been validly published at the time of this writing.

<sup>c</sup> – *Soehngenia saccharolytica* and *Murdochiella asaccharolytica* have been included in the 16S rRNA gene-based trees (Fig. 1 and S1) but not in protein-based trees (Fig. 2 and S2). On protein trees, “*Murdochiella massiliensis*” strain SIT12 and *Murdochiella* sp. Marseille-P2341, neither of which has been validly described, clustered with *Helcococcus kunzii* ATCC 51366<sup>T</sup>.

**Table S2. Sporulation genes in *C. acidurici*, *C. purinilyticum* and *E. angustum*<sup>a</sup>**

| <b>Gene name<br/>(<i>B. subtilis</i>)</b> | <b><i>Clostridium<br/>acidurici</i> ORF</b> | <b>BLAST<br/>E-value</b> | <b><i>Clostridium pu-<br/>rinilyticum</i> ORF</b> | <b>BLAST<br/>E-value</b> | <b><i>Eubacterium<br/>angustum</i> ORF</b> | <b>BLAST<br/>E-value</b> |
|-------------------------------------------|---------------------------------------------|--------------------------|---------------------------------------------------|--------------------------|--------------------------------------------|--------------------------|
| <i>spoOA</i>                              | Curi_c13920                                 | 1.4E-119                 | CLPU_17c00380                                     | 3.0E-93                  | EUAN_05540                                 | 6.0E-15                  |
| <i>sigE</i>                               | Curi_c13090                                 | 3.1E-118                 | CLPU_1c00780                                      | 1.0E-87                  | EUAN_11380                                 | 1.0E-12                  |
| <i>sigF</i>                               | Curi_c10310                                 | 1.5E-90                  | CLPU_3c00440                                      | 4.0E-72                  | EUAN_23280                                 | 2.0E-39                  |
| <i>spoIIQ</i>                             | Curi_c28430                                 | 6.9E-15                  | CLPU_32c00040                                     | 9.0E-11                  | EUAN_08450                                 | 1.0E-10                  |
| <i>spoIIIE</i>                            | Curi_c15450                                 | 1.0E-200                 | CLPU_5c01850                                      | 1.0E-155                 | EUAN_05950                                 | 2.0E-154                 |
| <i>spoIIJ</i>                             | Curi_c29550                                 | 2.3E-30                  | CLPU_19c00300                                     | 7.0E-21                  | EUAN_23410                                 | 5.0E-20                  |
| <i>spoVB</i>                              | Curi_c07380                                 | 1.4E-53                  | CLPU_12c00810                                     | 2.0E-41                  | EUAN_17640                                 | 1.0E-48                  |
| <i>spoVC</i>                              | Curi_c23840                                 | 2.4E-48                  | CLPU_12c00770                                     | 8.0E-45                  | EUAN_17670                                 | 8.0E-42                  |
| <i>spoVD</i>                              | Curi_c12960                                 | 2.5E-124                 | CLPU_1c00910                                      | 5.0E-127                 | EUAN_08190                                 | 1.0E-102                 |
| <i>spoVE</i>                              | Curi_c13000                                 | 4.7E-95                  | CLPU_1c00870                                      | 1.0E-74                  | EUAN_08150                                 | 2.0E-64                  |
| <i>spoVK</i>                              | Curi_c15210                                 | 3.2E-99                  | CLPU_5c02260                                      | 2.0E-82                  | EUAN_13590                                 | 6.0E-51                  |
| <i>spoVS</i>                              | Curi_c15390                                 | 2.0E-54                  | CLPU_5c01920                                      | 3.0E-34                  | EUAN_06010                                 | 2.0E-34                  |
| <i>spoVT</i>                              | Curi_c23810                                 | 7.1E-71                  | CLPU_12c00800                                     | 7.0E-61                  | EUAN_21930                                 | 8.0E-14                  |
| <i>bofA</i>                               | Curi_c01030                                 | 2.7E-04                  | CLPU_15c00040                                     | 6.1E-02                  | EUAN_20560                                 | 5.0E-04                  |
| <i>dapA</i>                               | Curi_c11790                                 | 2.9E-90                  | CLPU_1c01850                                      | 4.0E-71                  | EUAN_18870                                 | 6.0E-64                  |
| <i>dapB</i>                               | Curi_c11780                                 | 8.3E-24                  | CLPU_1c01860                                      | 5.0E-20                  | EUAN_18860                                 | 4.0E-16                  |
| <i>gerM</i>                               | Curi_c03250                                 | 1.8E-20                  | CLPU_20c00080                                     | 6.0E-23                  | EUAN_16680                                 | 2.0E-05                  |
| <i>spmA</i>                               | Curi_c01200                                 | 1.0E-42                  | CLPU_2c02710                                      | 7.0E-43                  | –                                          | –                        |
| <i>spmB</i>                               | Curi_c01210                                 | 2.0E-41                  | CLPU_2c02700                                      | 3.0E-44                  | –                                          | –                        |
| <i>spoIID</i>                             | Curi_c02090                                 | 8.0E-50                  | CLPU_2c01570                                      | 2.0E-50                  | –                                          | –                        |
| <i>spoIIM</i>                             | Curi_c14030                                 | 3.0E-29                  | CLPU_17c00460                                     | 5.0E-25                  | –                                          | –                        |
| <i>spoIIP</i>                             | Curi_c18350                                 | 3.0E-24                  | CLPU_3c01440                                      | 2.0E-18                  | –                                          | –                        |
| <i>spoIIR</i>                             | Curi_c01580                                 | 8.0E-33                  | CLPU_2c02290                                      | 8.0E-35                  | –                                          | –                        |
| <i>spoIIIAA</i>                           | Curi_c13720                                 | 2.0E-66                  | CLPU_17c00160                                     | 2.0E-70                  | –                                          | –                        |
| <i>spoIIIAB</i>                           | Curi_c13730                                 | 1.0E-21                  | CLPU_17c00170                                     | 1.0E-13                  | –                                          | –                        |
| <i>spoIIIAC</i>                           | Curi_c13740                                 | 8.0E-08                  | CLPU_17c00180                                     | 1.0E-12                  | –                                          | –                        |
| <i>spoIIIAD</i>                           | Curi_c13750                                 | 5.0E-26                  | CLPU_17c00190                                     | 9.0E-32                  | –                                          | –                        |
| <i>spoIIIAE</i>                           | Curi_c13760                                 | 2.0E-53                  | CLPU_17c00200                                     | 1.0E-55                  | –                                          | –                        |
| <i>spoIIIAF</i>                           | Curi_c13770                                 | 9.0E-05                  | CLPU_10c00130                                     | 2.0E-14                  | –                                          | –                        |
| <i>spoIIIAG</i>                           | Curi_c13780                                 | 1.0E-08                  | CLPU_17c00220                                     | 2.0E-08                  | –                                          | –                        |
| <i>spoIIIAH</i>                           | Curi_c13790                                 | 3.0E-05                  | CLPU_17c00230                                     | 2.0E-07                  | –                                          | –                        |
| <i>spoIIID</i>                            | Curi_c02110                                 | 1.0E-25                  | CLPU_2c01550                                      | 7.0E-26                  | –                                          | –                        |
| <i>spoIVA</i>                             | Curi_c17050                                 | 8.0E-149                 | CLPU_5c00240                                      | 5.0E-152                 | –                                          | –                        |
| <i>spoIVB</i>                             | Curi_c13910                                 | 1.0E-82                  | CLPU_17c00370                                     | 7.0E-92                  | –                                          | –                        |
| <i>spoVAC</i>                             | Curi_c10320                                 | 2.0E-27                  | CLPU_3c00390                                      | 1.0E-26                  | –                                          | –                        |
| <i>spoVAD</i>                             | Curi_c10330                                 | 2.0E-60                  | CLPU_3c00380                                      | 2.0E-78                  | –                                          | –                        |
| <i>spoVAEB</i>                            | Curi_c10340                                 | 3.0E-17                  | CLPU_3c00370                                      | 2.0E-18                  | –                                          | –                        |
| <i>spoVAF</i>                             | Curi_c18660                                 | 3.0E-100                 | CLPU_3c00350                                      | 6.0E-113                 | –                                          | –                        |
| <i>spoVG</i>                              | Curi_c23870                                 | 1.0E-27                  | CLPU_12c00740                                     | 2.0E-28                  | –                                          | –                        |

<sup>a</sup> – Best hits and expectation values of these hits being obtained solely by chance in the BLASTp searches of the protein databases of *C. acidurici*, *C. purinilyticum*, and *E. angustum* with proteins from *Bacillus subtilis* used as queries. A dash indicates the absence of the respective gene (protein) in *E. angustum*.

## References

- Alauzet, C., Marchandin, H., Courtin, P., Mory, F., Lemee, L., Pons, J. L., Chapot-Chartier, M. P., Lozniewski, A. & Jumas-Bilak, E. (2014). Multilocus analysis reveals diversity in the genus *Tissierella*: description of *Tissierella carlieri* sp. nov. in the new class *Tissierellia* classis nov. *Syst Appl Microbiol* **37**: 23-34.
- Collins, M. D., Lawson, P. A., Willems, A., Cordoba, J. J., Fernandez-Garayzabal, J., Garcia, P., Cai, J., Hippe, H. & Farrow, J. A. E. (1994). The phylogeny of the genus *Clostridium*: proposal of five new genera and eleven new species combinations. *Int J Syst Bacteriol* **44**: 812-826.
- Dione, N., Sankar, S. A., Lagier, J. C., Khelaifia, S., Michele, C., Armstrong, N., Richez, M., Abrahao, J., Raoult, D. & other authors (2016). Genome sequence and description of *Anaerosalibacter massiliensis* sp. nov. *New Microbes New Infect* **10**: 66-76.
- Edgar, R. C. (2004). MUSCLE: multiple sequence alignment with high accuracy and high throughput. *Nucleic Acids Res* **32**: 1792-1797.
- Federhen, S. (2015). Type material in the NCBI Taxonomy Database. *Nucleic Acids Res* **43**: D1086-D1098.
- Fonknechten, N., Chaussonnerie, S., Tricot, S., Lajus, A., Andreesen, J. R., Perchat, N., Pelletier, E., Gouyvenoux, M., Barbe, V. & other authors (2010). *Clostridium sticklandii*, a specialist in amino acid degradation: revisiting its metabolism through its genome sequence. *BMC Genomics* **11**: 555.
- Galperin, M. Y., Brover, V., Tolstoy, I. & Yutin, N. (2016). Phylogenomic analysis of the family *Peptostreptococcaceae* (*Clostridium* cluster XI) and proposal for reclassification of *Clostridium litorale* (Fendrich *et al.* 1991) and *Eubacterium acidaminophilum* (Zindel *et al.* 1989) as *Peptoclostridium litorale* gen. nov. comb. nov. and *Peptoclostridium acidaminophilum* comb. nov. *Int J Syst Evol Microbiol* **66**: 5506–5513.
- Goto, T., Yamashita, A., Hirakawa, H., Matsutani, M., Todo, K., Ohshima, K., Toh, H., Miyamoto, K., Kuhara, S. & other authors (2008). Complete genome sequence of *Fingoldia magna*, an anaerobic opportunistic pathogen. *DNA Res* **15**: 39-47.
- Guindon, S., Dufayard, J. F., Lefort, V., Anisimova, M., Hordijk, W. & Gascuel, O. (2010). New algorithms and methods to estimate maximum-likelihood phylogenies: assessing the performance of PhyML 3.0. *Syst Biol* **59**: 307-321.
- Hartwich, K., Poehlein, A. & Daniel, R. (2012). The purine-utilizing bacterium *Clostridium acidurici* 9a: a genome-guided metabolic reconsideration. *PLoS One* **7**: e51662.
- Johnson, C. N., Whitehead, T. R., Cotta, M. A., Rhoades, R. E. & Lawson, P. A. (2014). *Peptoniphilus stercorisuis* sp. nov., isolated from a swine manure storage tank and description of *Peptoniphilaceae* fam. nov. *Int J Syst Evol Microbiol* **64**: 3538-3545.
- Jones, D. T., Taylor, W. R. & Thornton, J. M. (1992). The rapid generation of mutation data matrices from protein sequences. *Comput Appl Biosci* **8**: 275-282.
- Kumar, S., Stecher, G. & Tamura, K. (2016). MEGA7: Molecular Evolutionary Genetics Analysis version 7.0 for bigger datasets. *Mol Biol Evol* **33**: 1870-1874.

- Labutti, K., Pukall, R., Steenblock, K., Glavina Del Rio, T., Tice, H., Copeland, A., Cheng, J. F., Lucas, S., Chen, F. & other authors (2009).** Complete genome sequence of *Anaerococcus prevotii* type strain (PC1). *Stand Genomic Sci* **1**: 159-165.
- Lawson, P. A., Citron, D. M., Tyrrell, K. L. & Finegold, S. M. (2016).** Reclassification of *Clostridium difficile* as *Clostridioides difficile* (Hall and O'Toole 1935) Prevot 1938. *Anaerobe* **40**: 95-99.
- Nacke, H., Daniel, R. & Poehlein, A. (2017).** Genome sequence of creatinine-fermenting *Tissierella creatinophila* strain KRE 4<sup>T</sup> (DSM 6911). *Genome Announc* **5**: e00051-00017.
- Parte, A. C. (2014).** LPSN--list of prokaryotic names with standing in nomenclature. *Nucleic Acids Res* **42**: D613-D616.
- Poehlein, A., Alghaithi, H. S., Chandran, L., Chibani, C. M., Davydova, E., Dhamotharan, K., Ge, W., Gutierrez-Gutierrez, D. A., Jagirdar, A. & other authors (2014).** First insights into the genome of the amino acid-metabolizing bacterium *Clostridium litorale* DSM 5388. *Genome Announc* **2**: e00754-00714.
- Poehlein, A., Bengelsdorf, F. R., Schiel-Bengelsdorf, B., Daniel, R. & Dürre, P. (2015a).** Draft genome sequence of purine-degrading *Gottschalkia purinilyticum* (formerly *Clostridium purinilyticum*) WA1 (DSM 1384). *Genome Announc* **3**: e01088-01015.
- Poehlein, A., Montoya Solano, J. D., Bengelsdorf, F. R., Schiel-Bengelsdorf, B., Daniel, R. & Dürre, P. (2015b).** Draft genome sequence of purine-degrading *Clostridium cylindrosporium* HC-1 (DSM 605). *Genome Announc* **3**: e00917-00915.
- Poehlein, A., Galperin, M. Y., Andreesen, J. R. & Daniel, R. (2017).** Genome sequence of uric acid-fermenting *Eubacterium angustum* DSM 1989T (MK-1). *Genome Announc* **5**: e01439-01416.
- Price, M. N., Dehal, P. S. & Arkin, A. P. (2010).** FastTree 2--approximately maximum-likelihood trees for large alignments. *PLoS One* **5**: e9490.
- Riedel, T., Bunk, B., Wittmann, J., Thurmer, A., Sproer, C., Gronow, S., Liesegang, H., Daniel, R. & Overmann, J. (2015).** Complete genome sequence of the *Clostridium difficile* type strain DSM 1296<sup>T</sup>. *Genome Announc* **3**: e01186-01115.
- Sirigi Reddy, A. R., Girinathan, B. P., Zapotocny, R. & Govind, R. (2013).** Identification and characterization of *Clostridium sordellii* toxin gene regulator. *J Bacteriol* **195**: 4246-4254.
- Tamura, K. & Nei, M. (1993).** Estimation of the number of nucleotide substitutions in the control region of mitochondrial DNA in humans and chimpanzees. *Mol Biol Evol* **10**: 512-526.
- Thompson, J. D., Higgins, D. G. & Gibson, T. J. (1994).** CLUSTAL W: improving the sensitivity of progressive multiple sequence alignment through sequence weighting, position-specific gap penalties and weight matrix choice. *Nucleic Acids Res* **22**: 4673-4680.
- Wei, Y., Zhou, H., Zhang, L., Zhang, J., Wang, Y., Wang, S., Zhou, Z. & Yan, X. (2014).** Draft genome sequence of *Clostridium ultunense* strain BS (DSMZ 10521), recovered from a mixed culture. *Genome Announc* **2**: e01269-01213.



- Xin, B., Tao, F., Wang, Y., Gao, C., Ma, C. & Xu, P. (2013).** Genome sequence of *Clostridium butyricum* strain DSM 10702, a promising producer of biofuels and biochemicals. *Genome Announc* **1**: e00563-00513.
- Yilmaz, P., Parfrey, L. W., Yarza, P., Gerken, J., Pruesse, E., Quast, C., Schweer, T., Peplies, J., Ludwig, W. & other authors (2014).** The SILVA and "All-species Living Tree Project (LTP)" taxonomic frameworks. *Nucleic Acids Res* **42**: D643-D648.
- Yutin, N., Puigbo, P., Koonin, E. V. & Wolf, Y. I. (2012).** Phylogenomics of prokaryotic ribosomal proteins. *PLoS One* **7**: e36972.
- Yutin, N. & Galperin, M. Y. (2013).** A genomic update on clostridial phylogeny: Gram-negative spore formers and other misplaced clostridia. *Environ Microbiol* **15**: 2631-2641.

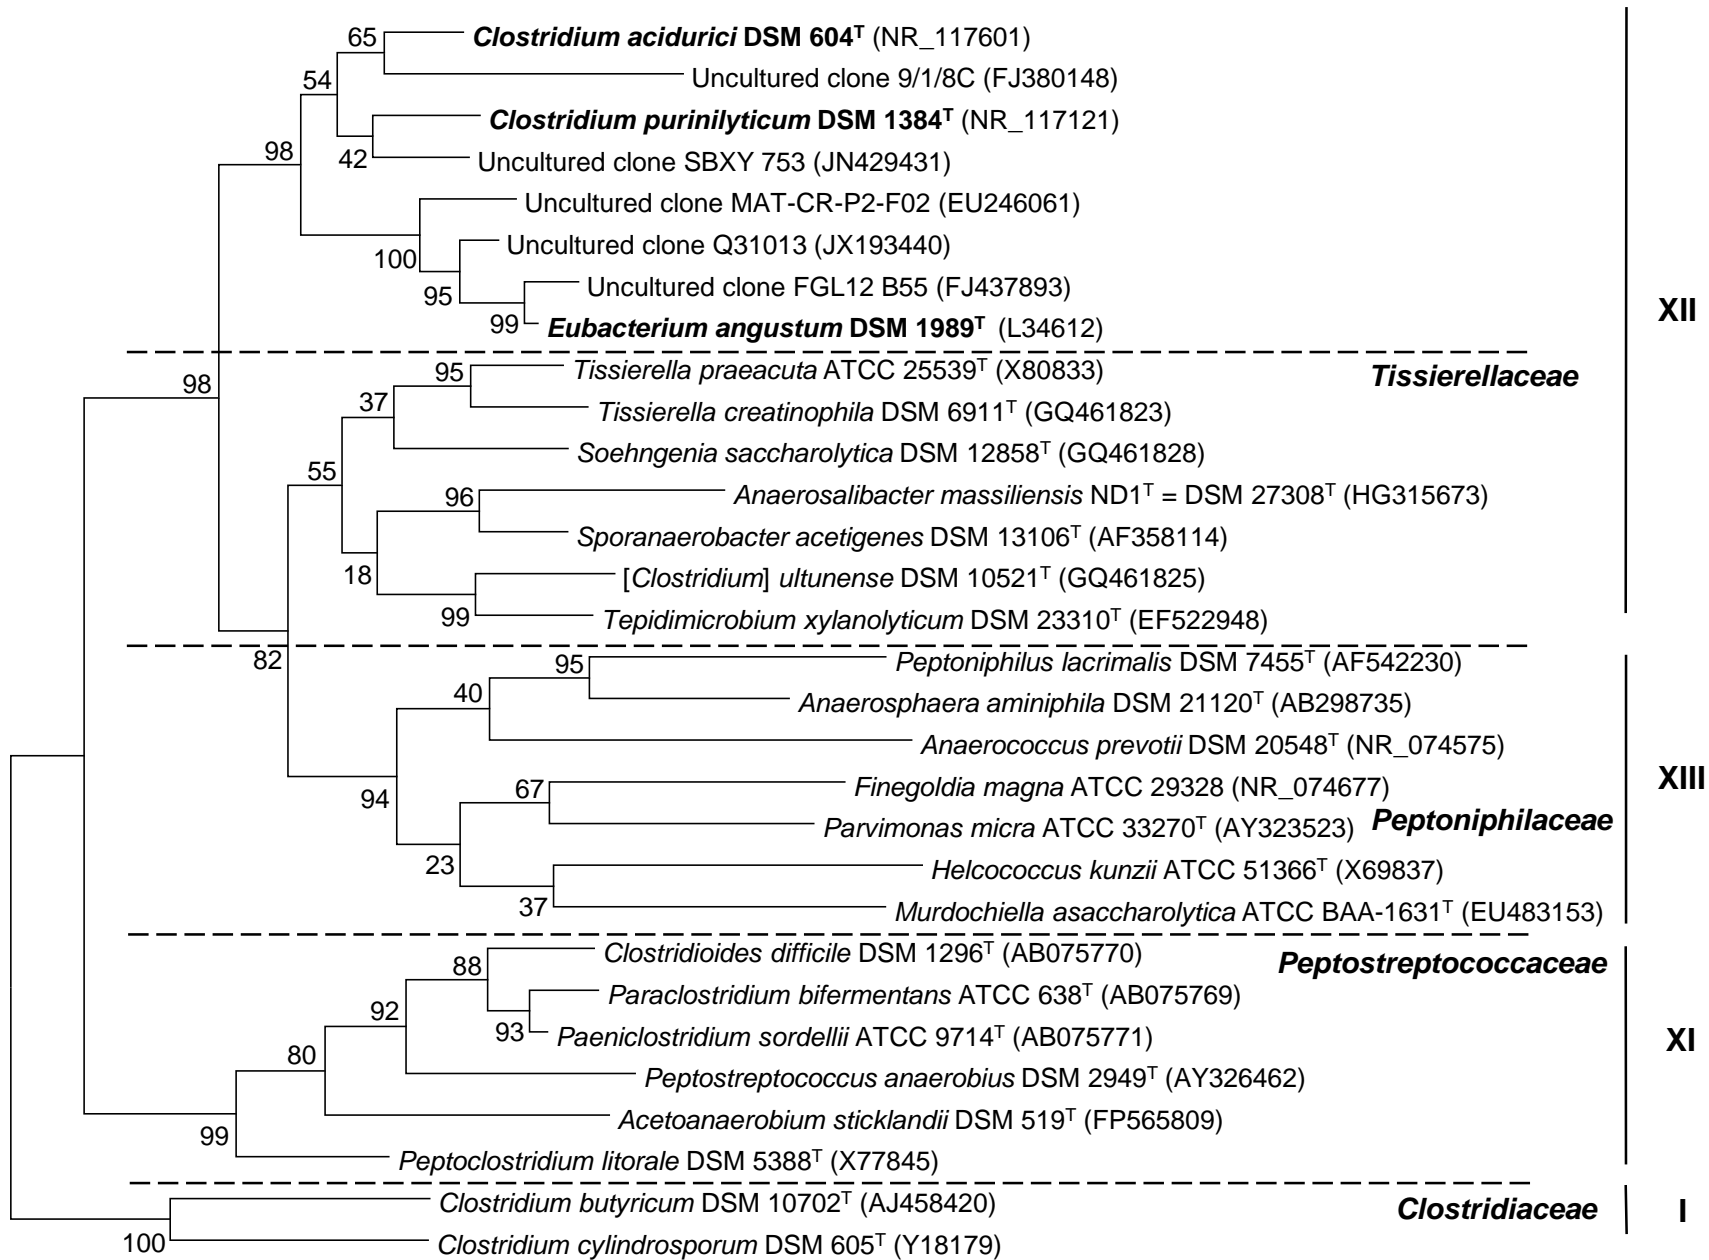

XII

XIII

XI

I

0.020

**Figure S1. 16S rRNA gene-based phylogenetic tree of proposed *Gottschalkiaceae* species, related organisms and uncultured metagenomic samples.** Members of the proposed new genera *Gottschalkia* and *Andreesenia* are shown in bold. The sequences from type strains (indicated with <sup>†</sup>) were used and listed under their DSM accession numbers, where available. GenBank accession numbers are listed in parentheses. Roman numerals on the right indicate clostridial cluster assignments of Collins *et al.* (1994). The evolutionary history was inferred by using the maximum likelihood method based on the Tamura-Nei model (Tamura & Nei, 1993) as implemented in MEGA7 (Kumar *et al.*, 2016). The percentage of trees in which the associated taxa clustered together is shown next to the branches. The tree is drawn to scale, with branch lengths measured in the number of substitutions per site. All positions containing gaps and missing data were eliminated. There were a total of 1273 positions in the final dataset. The tree was rooted using sequences from *C. butyricum* and *C. cylindrosporum*, members of *Clostridium sensu stricto* (cluster I). The name *Anaerosalibacter massiliensis* has been effectively published (Dione *et al.*, 2016) but not validly published at the time of this writing.

Fig. S2a

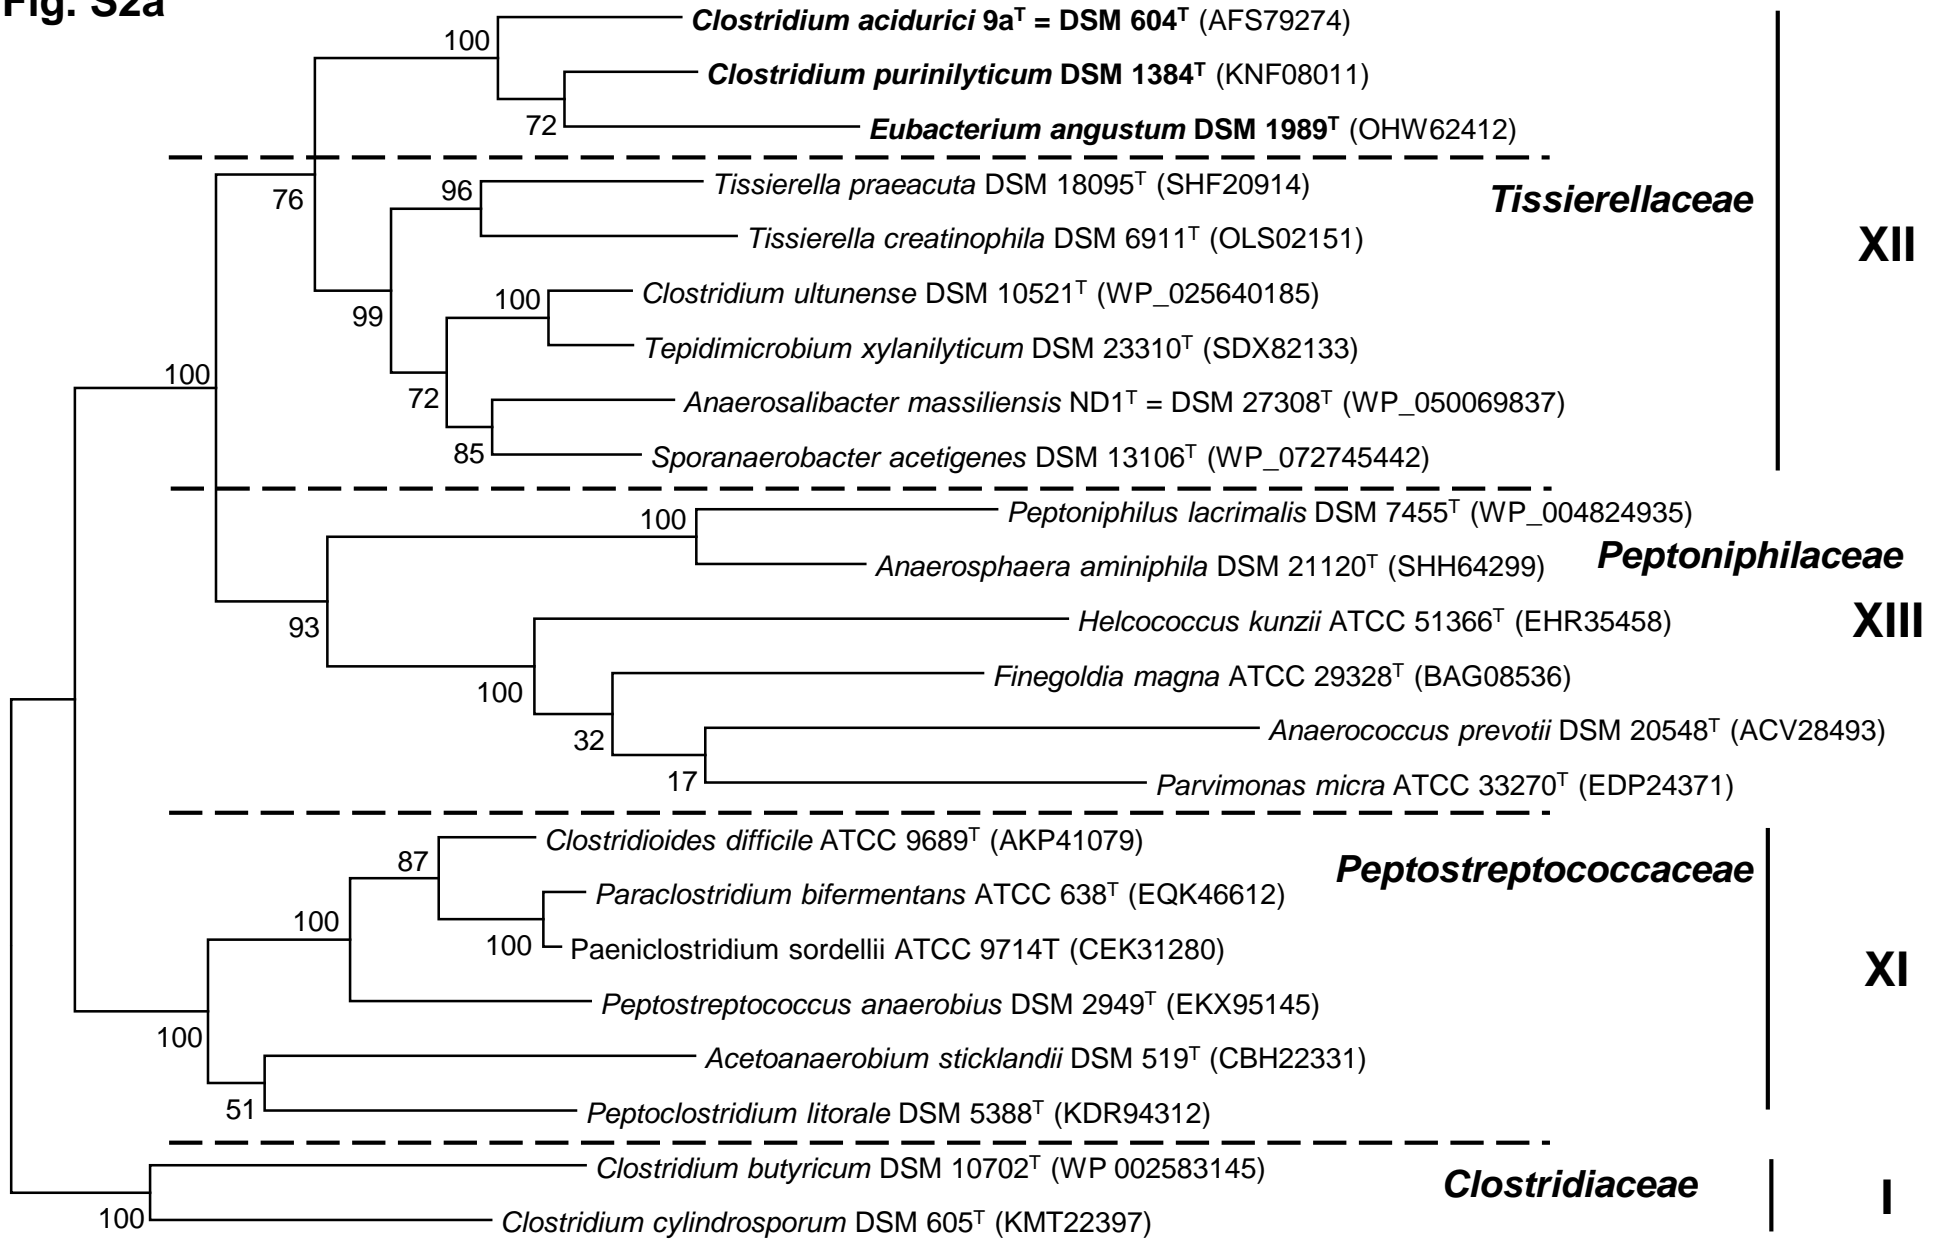

0.050

**Fig. S2b**

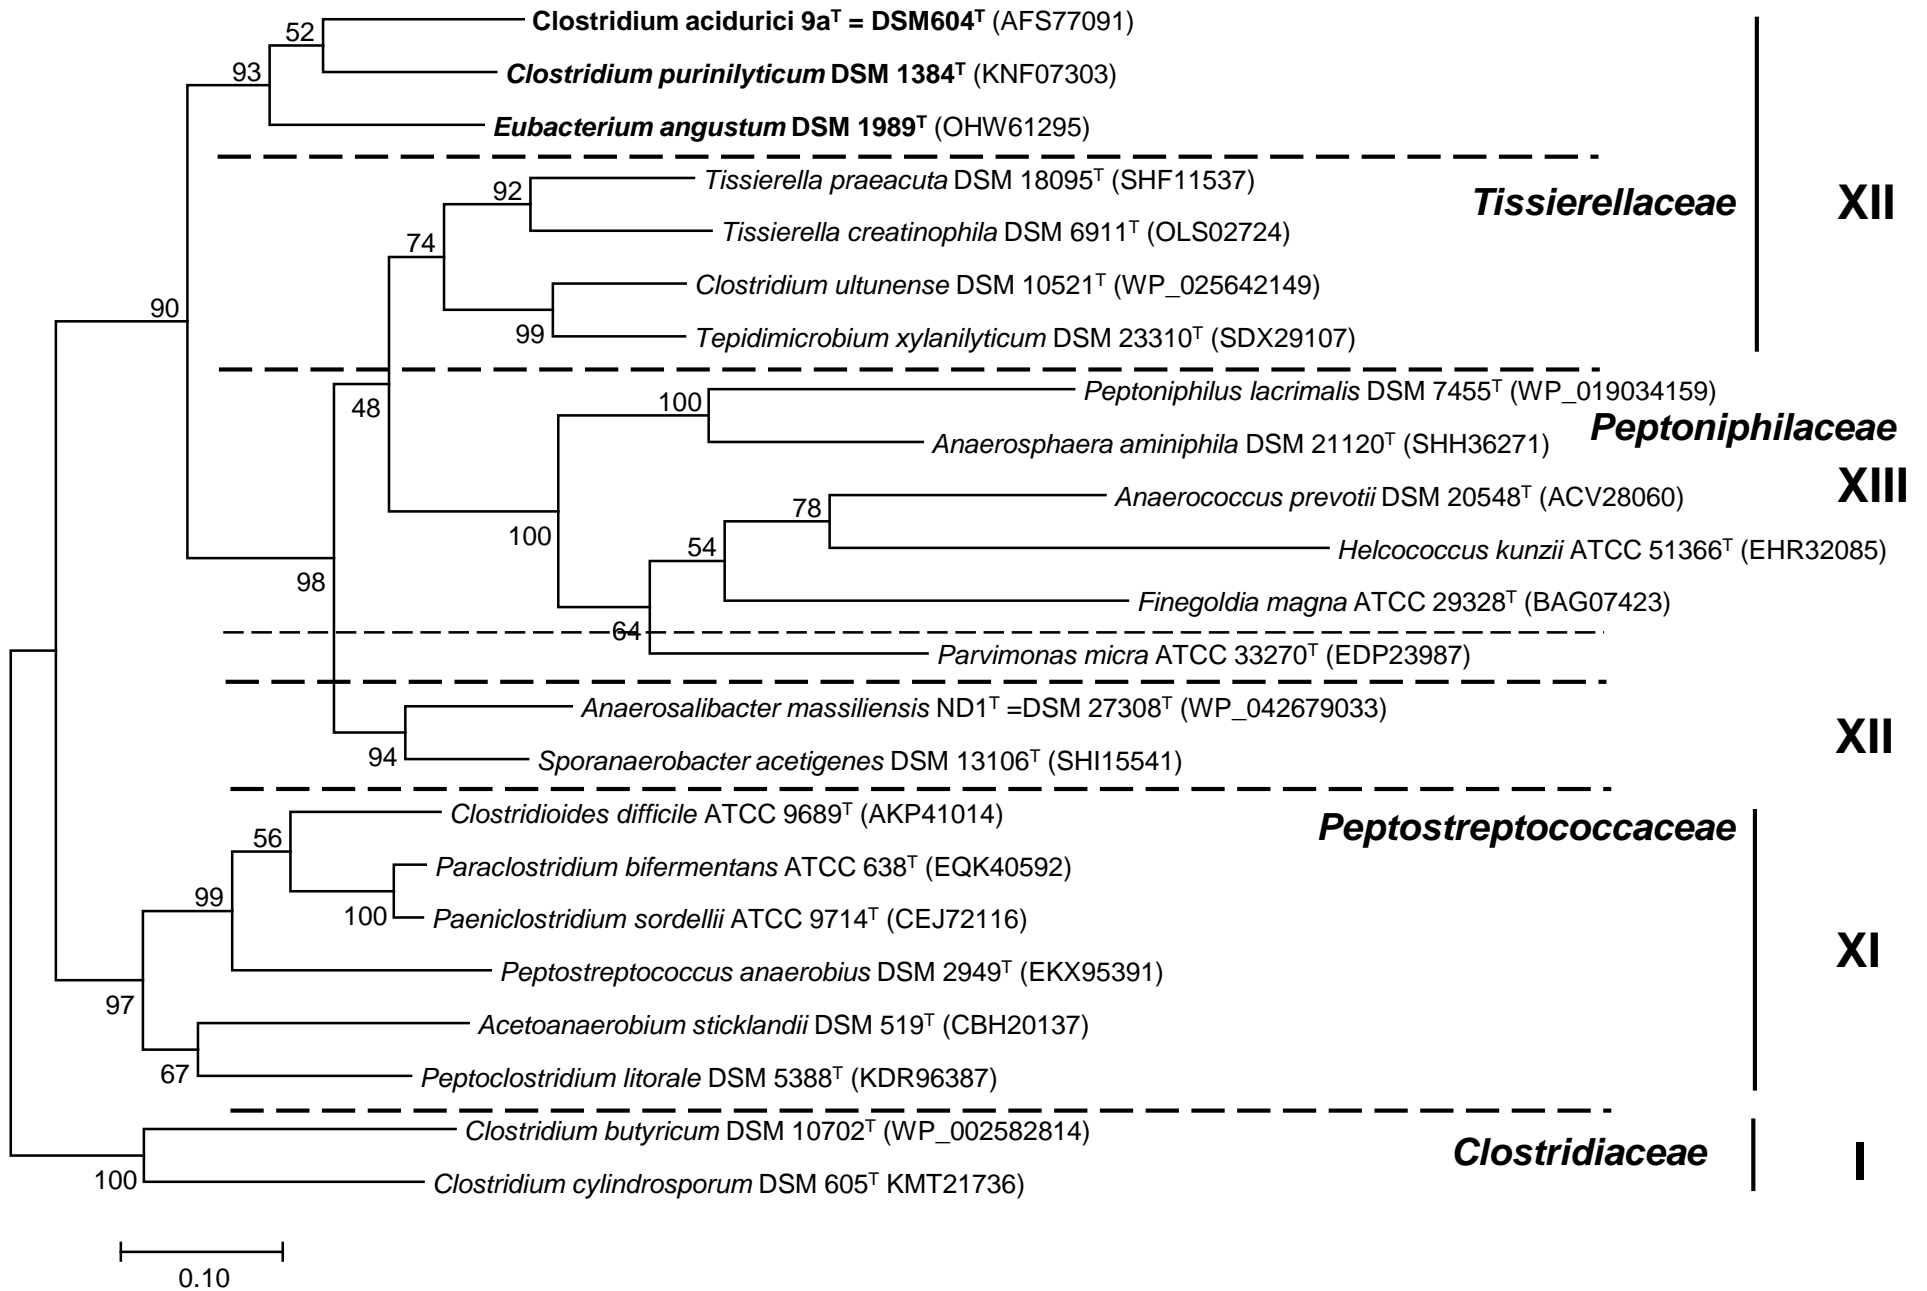

**Figure S2. Phylogenetic trees of RpoB (A) and GyrB (B) sequences from *Clostridium acidurici* and related organisms.**

Members of the proposed family *Gottschalkiaceae* (genera *Gottschalkia* and *Andreesenia*) are shown in bold. The sequences were taken from the respective genome entries, listed in Table S1. The protein accession numbers in the NCBI protein database are shown in parentheses. The sequences from type strains (indicated with <sup>T</sup>) were used and listed under their DSM accession numbers, where available. Roman numerals on the right indicate clostridial cluster assignments of Collins *et al.* (1994). The dashed lines indicate the boundaries between the family *Tissereliaceae* (in cluster XII), *Peptonophilaceae* (cluster XIII), *Peptostreptococcaceae* (cluster XI) and *Clostridiaceae* (cluster I), see Alauzet *et al.* (2014), Johnson *et al.* (2014), and Galperin *et al.* (2016). The alignments were constructed using MUSCLE (Edgar, 2004) and the evolutionary history was inferred by using the maximum likelihood method based on the Tamura-Nei model (Tamura & Nei, 1993). The trees with the highest log likelihoods are shown. The percentage of trees in which the associated taxa clustered together is shown next to each branch. The trees are drawn to scale, with branch lengths measured in the number of substitutions per site. The trees were rooted using sequences from *C. butyricum* and *C. cylindrosporum*, members of *Clostridium sensu stricto* (cluster I). Evolutionary analyses were conducted in MEGA7 (Kumar *et al.*, 2016).
